# Supplementary material for: Lyplal1 is dispensable for normal fat deposition in mice
Source: PubMed Central journal article supplement (PMC5769613; doi:10.1242/dmm.031864), 2017-12-01
Supplement: dmm-10-031864-s1.pdf [file dmm-10-031864-s1.pdf]

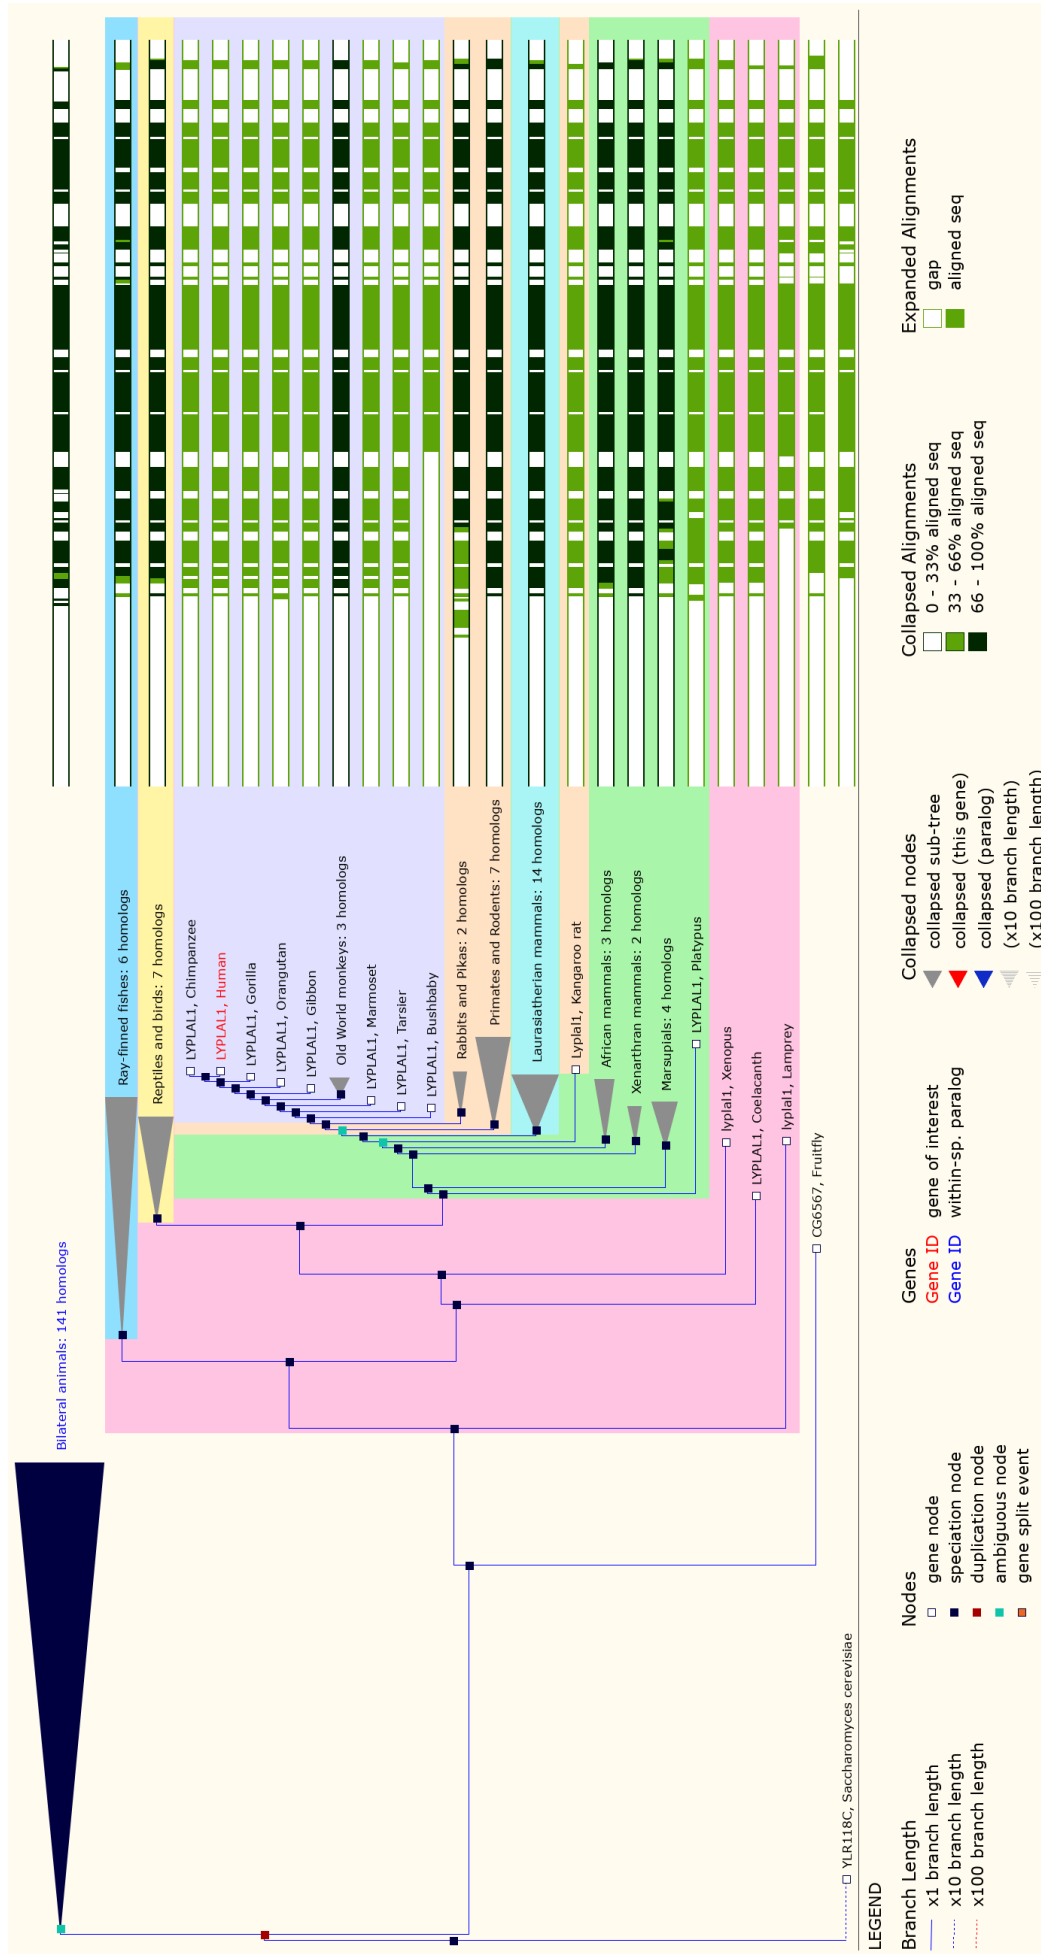

**Figure S1** – Figure demonstrates the conservation of *Lyplal1* across many species. Taken from Ensembl ([www.ensembl.org](http://www.ensembl.org)).

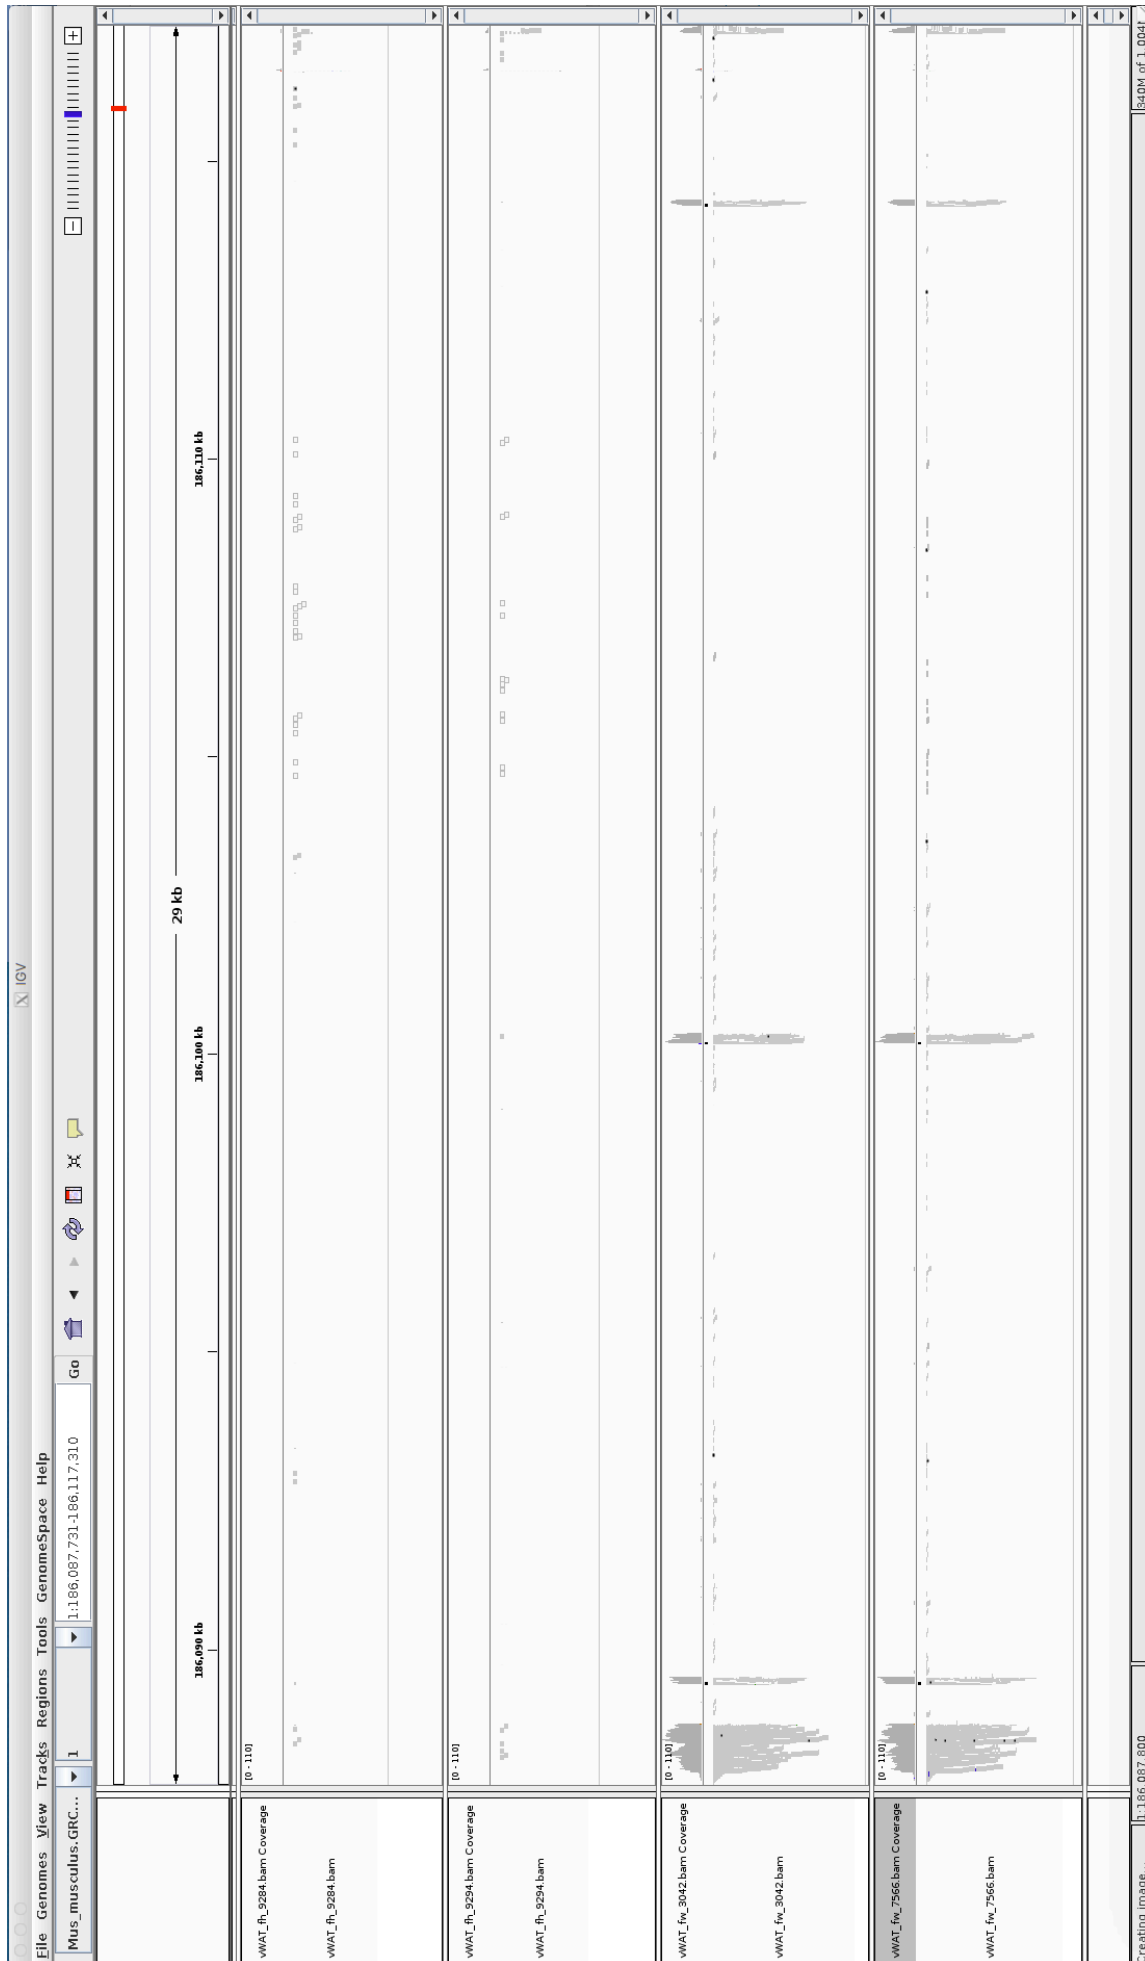

**Figure S2** – RNAseq results demonstrate that there are only a few detectable reads in exon 1 of *Lypl1l1*. Representative vWAT samples shown, upper two panels show wildtype samples and lower two panels show *Lypl1l1*<sup>tm1a/tm1a</sup> samples. Figure was generated using IGV.

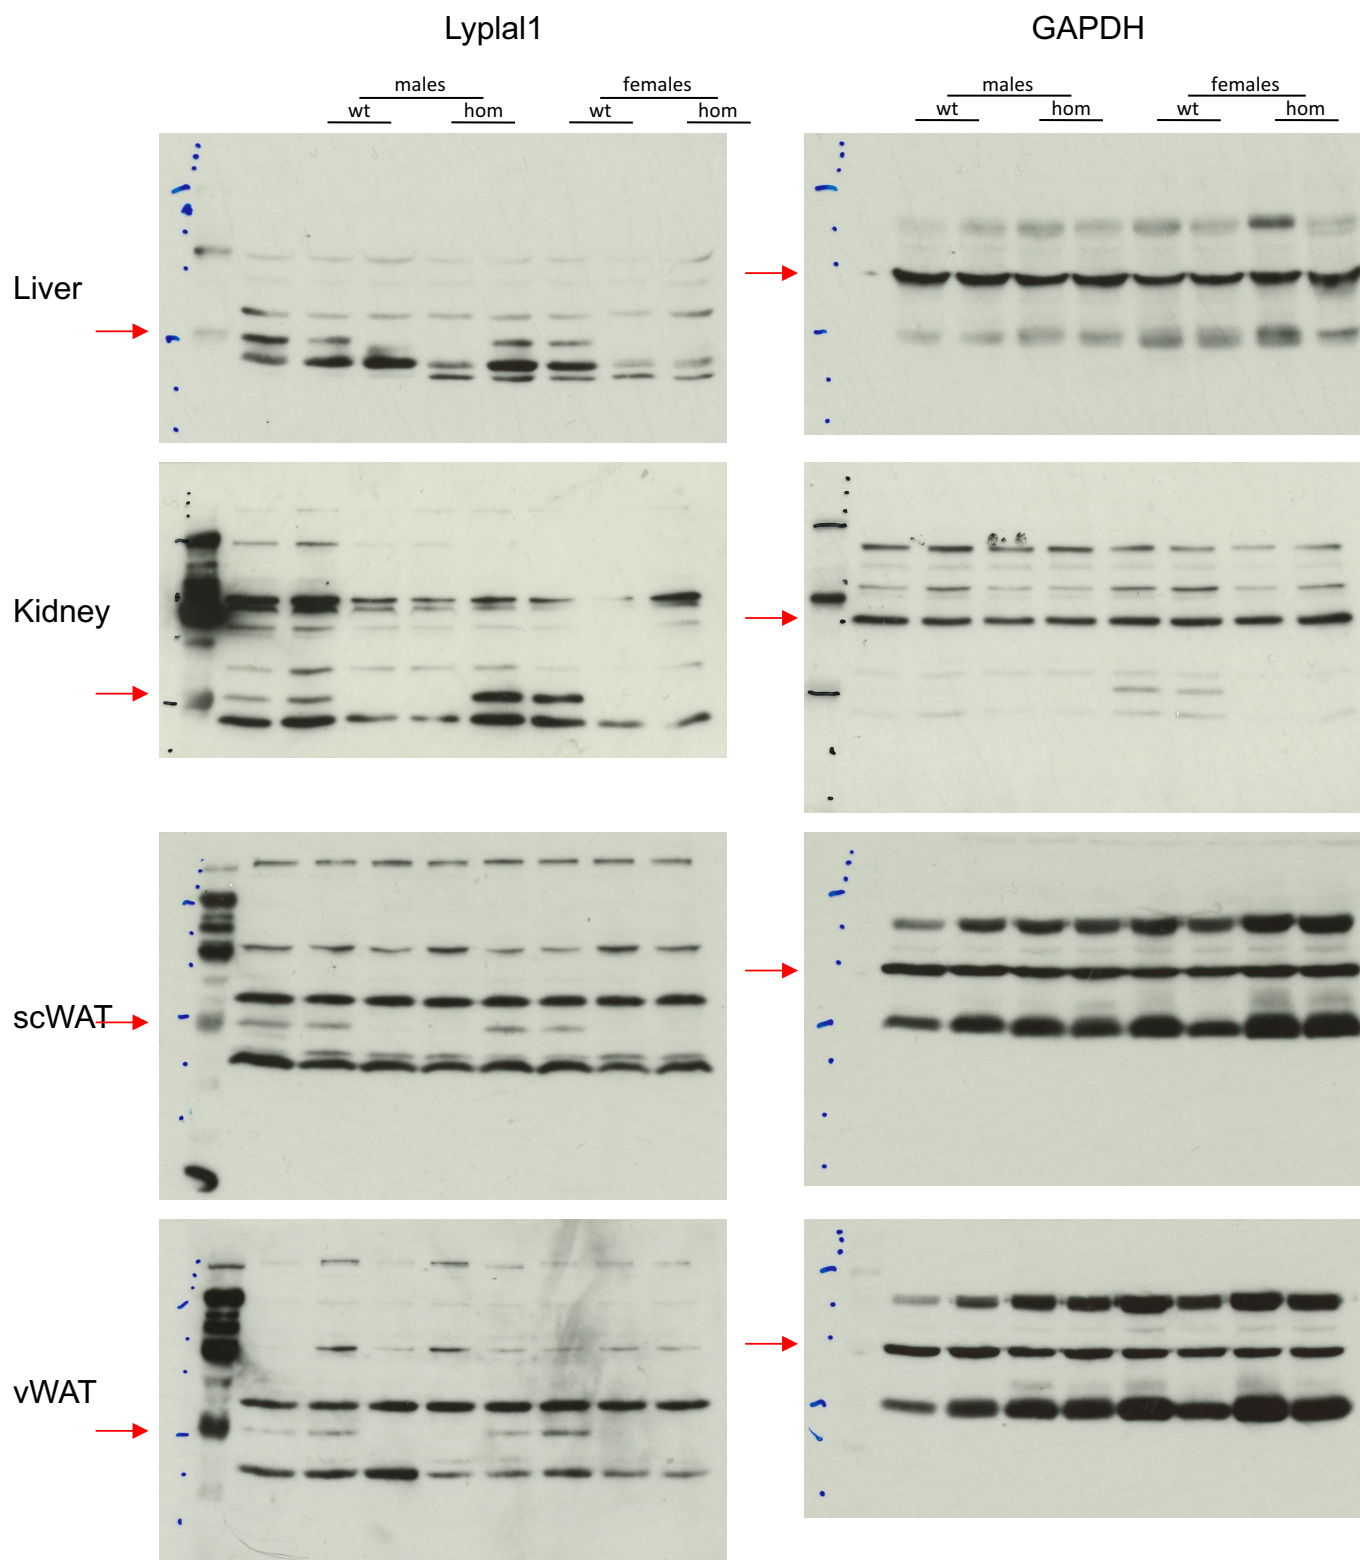

**Figure S3** – Lyplal1 is knocked out at the protein level. Shown are the original Western blots. Blue marks on the left hand side correspond to Bio-Rad Dual Color Precision Plus Protein markers (250, 150, 100, 75, 50, 37, 25, 20, 15 kDa). Red arrows indicate the band for Lyplal1/GAPDH.

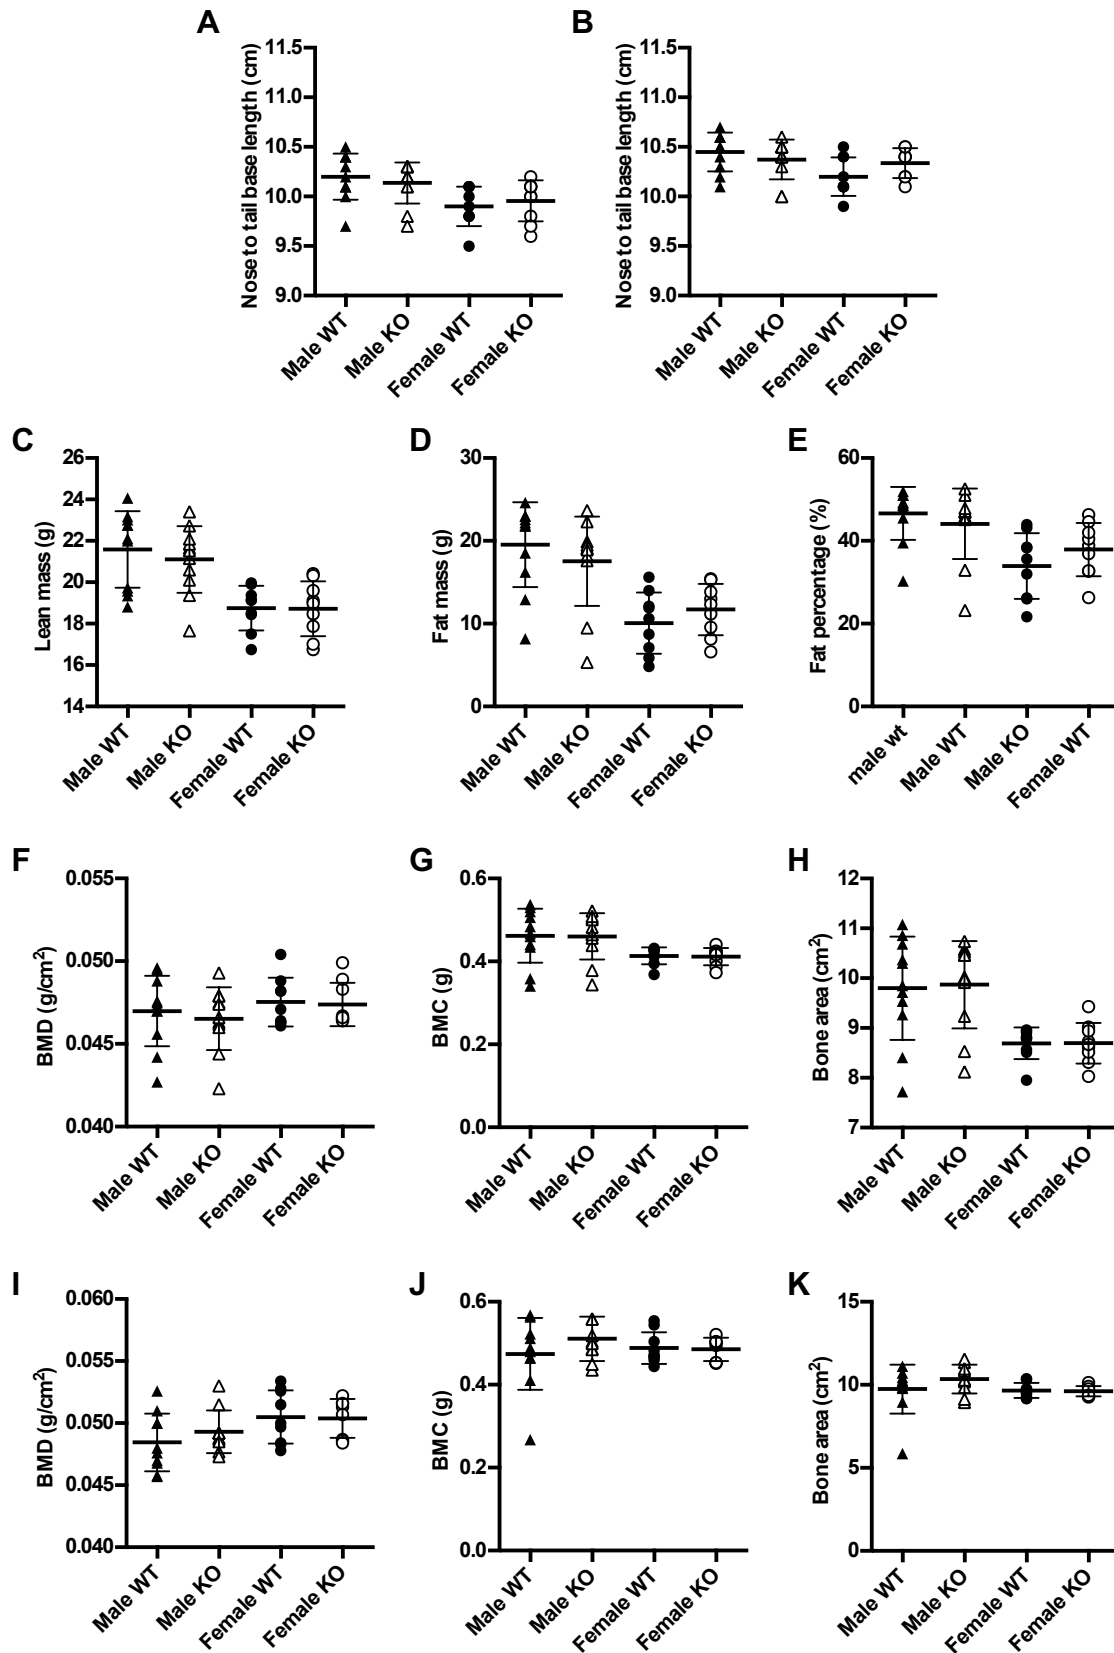

**Figure S4** – *Lyplal1* knockout does not alter body composition in *Lyplal1* knockout mice fed high fat diet from 6 weeks of age.

A & B: Nose to tail base length was unaltered in 14-week-old (A) and 24-week-old (B) knockout mice. C-H: Lean mass (C), fat mass (D) and fat percentage (E), bone mineral density (BMD, F), bone mineral content (BMC, G) and bone area (H) were unaltered in 14-week-old knockout mice, measured by DEXA. I-J: BMD (I), BMC (J) and bone area (K) were unaltered in 24 week old knockout mice, measured by DEXA.

Black triangles = male *Lyplal1*<sup>+/+</sup>, white triangles = male *Lyplal1*<sup>tm1a/tm1a</sup>, black circles = female *Lyplal1*<sup>+/+</sup>, white circles = female *Lyplal1*<sup>tm1a/tm1a</sup>. Data are presented as means ± s.d. (n=11 males, 9 females per genotype A-H, n=10 males per genotype, n=9 female *Lyplal1*<sup>+/+</sup>, n=8 female *Lyplal1*<sup>tm1a/tm1a</sup> I-K).

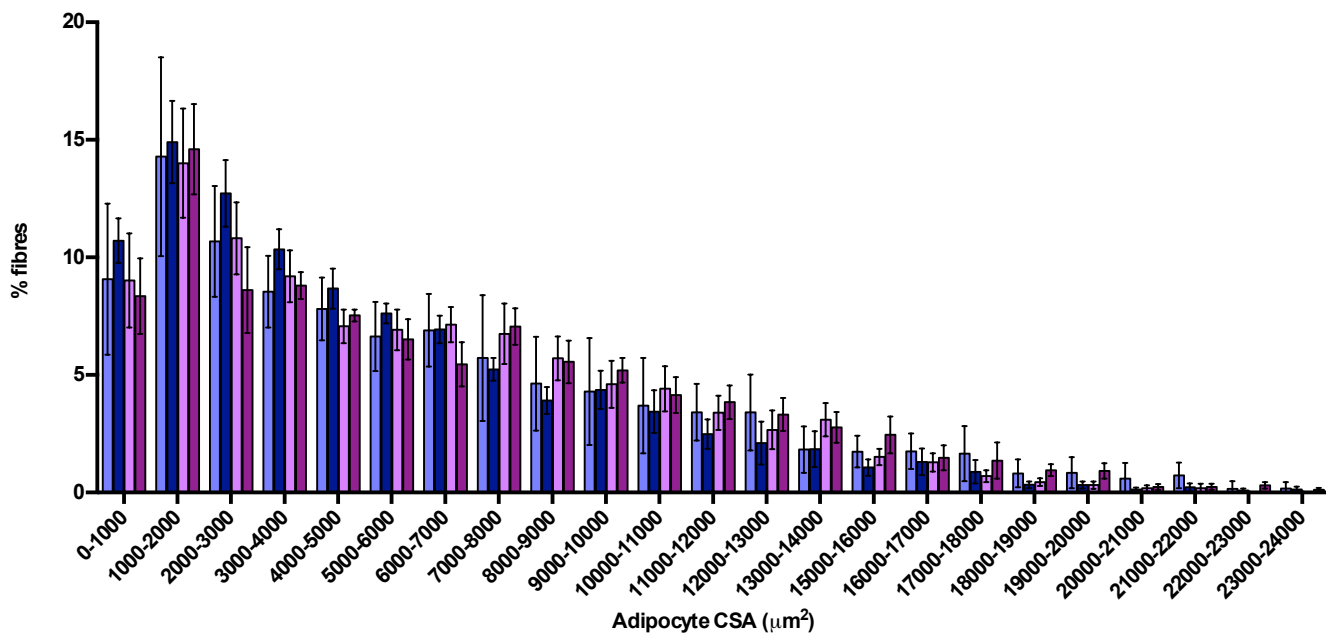

**Figure S5** – *Lyplal1* knockout does not alter distribution of adipocyte CSA.

Relative adipocyte cross sectional area (CSA) was determined using ImageJ analysis of scWAT sections stained with H&E, and grouped into bins of 1000  $\mu\text{m}^2$ . Light blue = male *Lyplal1*<sup>+/+</sup>, dark blue = male *Lyplal1*<sup>tm1a/tm1a</sup>, light purple = female *Lyplal1*<sup>+/+</sup>, dark purple = female *Lyplal1*<sup>tm1a/tm1a</sup>. Data are presented as means  $\pm$  s.d. (n=9 male *Lyplal1*<sup>+/+</sup>, n=8 male *Lyplal1*<sup>tm1a/tm1a</sup>, n=7 female *Lyplal1*<sup>+/+</sup>, n=8 female *Lyplal1*<sup>tm1a/tm1a</sup>).

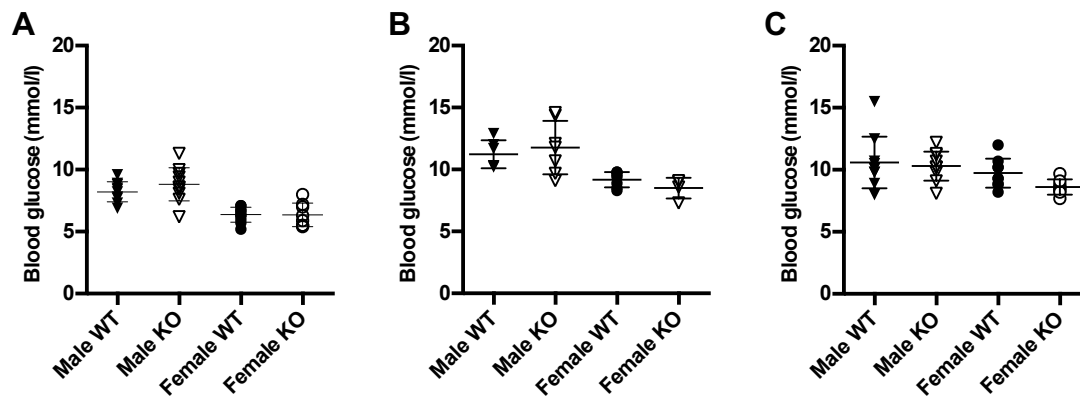

**Figure S6** – Fasting blood glucose was unaltered in *Lyplal1* knockout mice after different length fasts and at different ages.

a: 22-week-old mice were fasted for 16 h overnight before blood glucose measurement. b: 18-week-old mice were fasted for 6 h before blood glucose measurement. c: 28-week-old mice were fasted for 4 h before blood glucose measurement.

Black triangles = male *Lyplal1*<sup>+/+</sup>, white triangles = male *Lyplal1*<sup>tm1a/tm1a</sup>, black circles = female *Lyplal1*<sup>+/+</sup>, white circles = female *Lyplal1*<sup>tm1a/tm1a</sup>. Data are presented as means ± s.d., mixed model analysis performed using PhenStat (A: n=6 male *Lyplal1*<sup>+/+</sup>, n=6 male *Lyplal1*<sup>tm1a/tm1a</sup>, n=6 female *Lyplal1*<sup>+/+</sup>, n=5 female *Lyplal1*<sup>tm1a/tm1a</sup>, B: n=10 male *Lyplal1*<sup>+/+</sup>, n=11 male *Lyplal1*<sup>tm1a/tm1a</sup>, n=10 female *Lyplal1*<sup>+/+</sup>, n=8 female *Lyplal1*<sup>tm1a/tm1a</sup>, C: n=10 male *Lyplal1*<sup>+/+</sup>, n=10 male *Lyplal1*<sup>tm1a/tm1a</sup>, n=9 female *Lyplal1*<sup>+/+</sup>, n=8 female *Lyplal1*<sup>tm1a/tm1a</sup>).

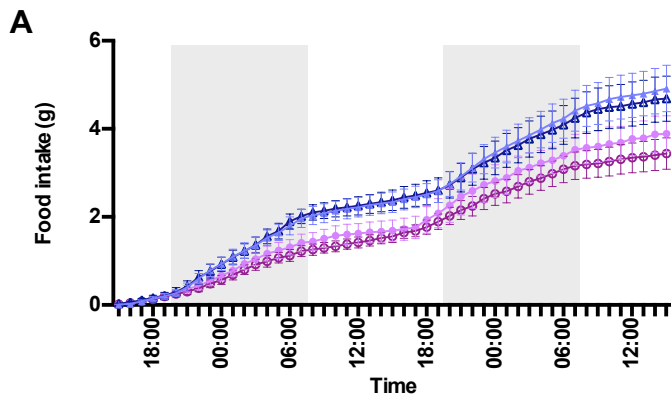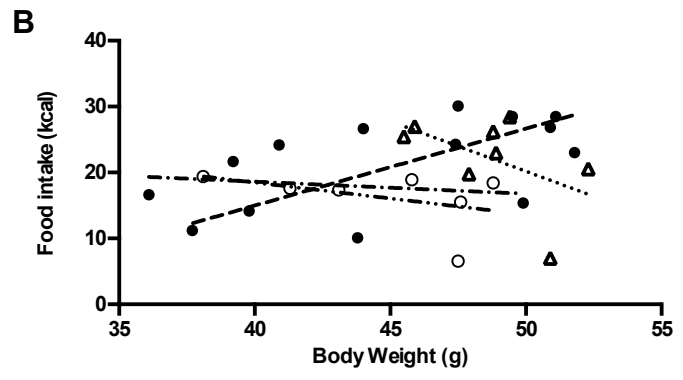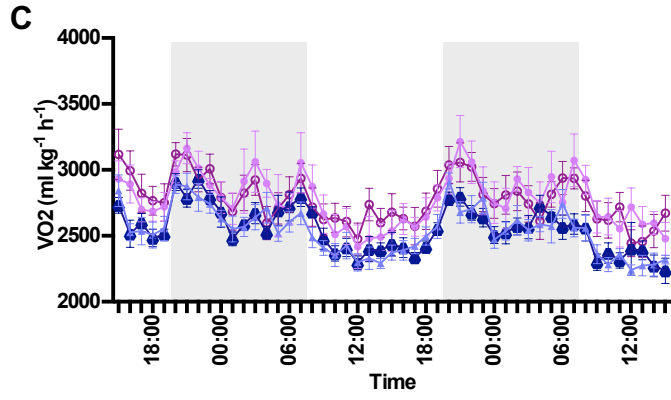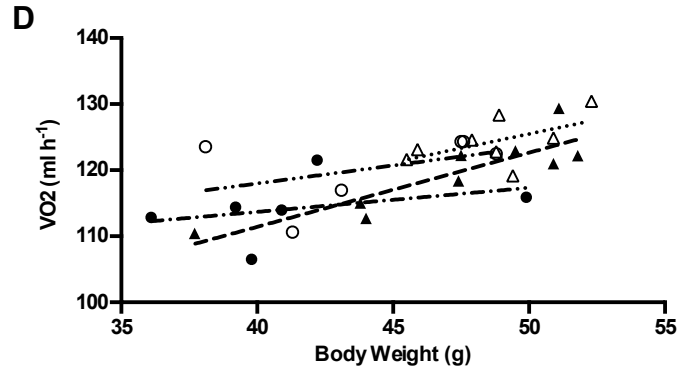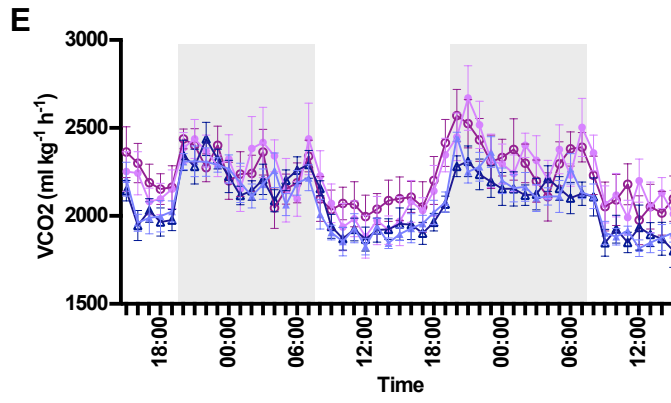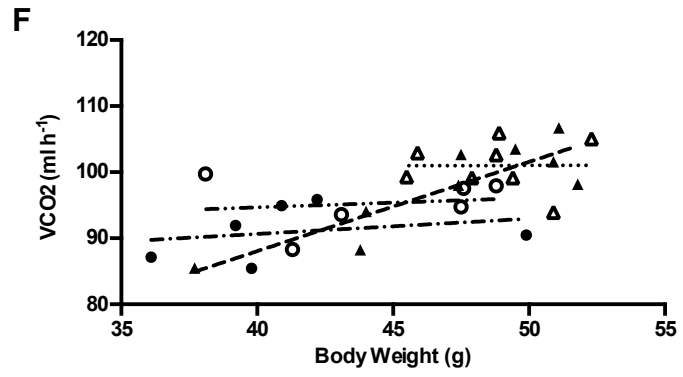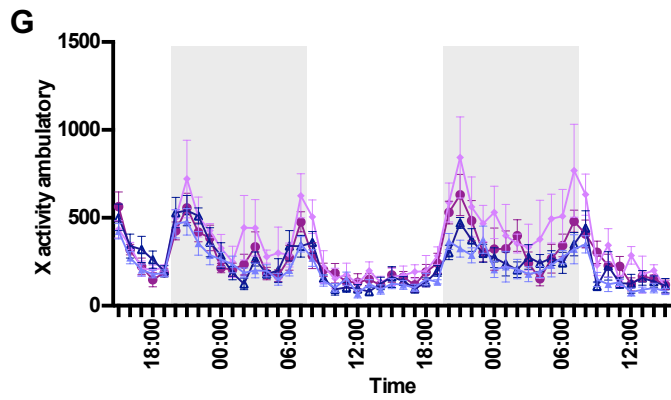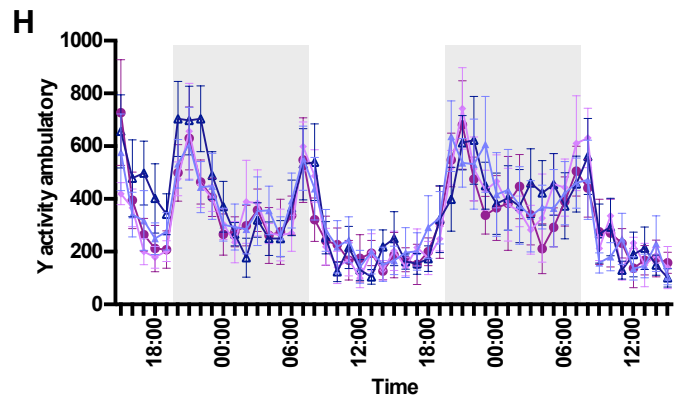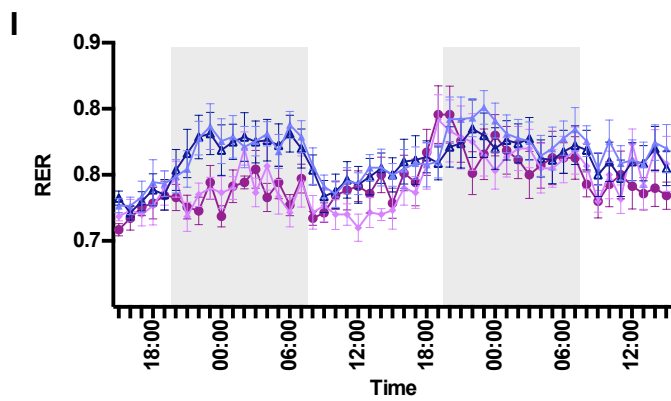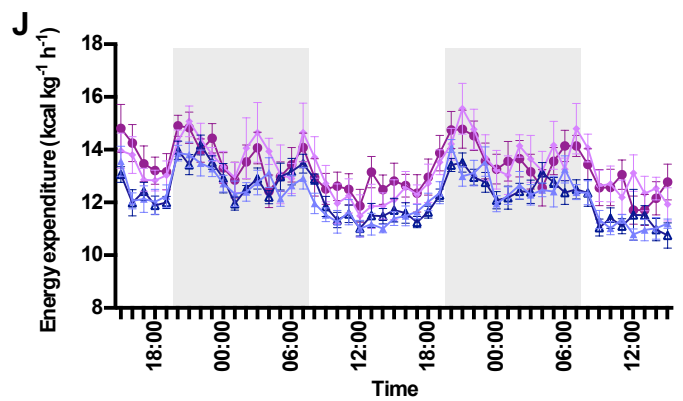

**Figure S7** – *Lyplal1* knockout does not cause large changes during 48 h indirect calorimetry at 26 weeks of age. Shaded areas show the periods of dark (1930-0730).

A & B: Food intake was unaltered by genotype or sex. C & D: There was a significant effect of genotype on VO<sub>2</sub> (p=0.038 for genotype, linear model). E & F: VCO<sub>2</sub> was unaltered by genotype or sex. G-J: Raw data graphs for X activity, Y activity, RER and energy expenditure.

Black or light blue triangles = male *Lyplal1*<sup>+/+</sup>, white or dark blue triangles = male *Lyplal1*<sup>tm1a/tm1a</sup>, black or light purple circles = female *Lyplal1*<sup>+/+</sup>, white or dark purple circles = female *Lyplal1*<sup>tm1a/tm1a</sup>. Data are presented as means ± s.d. (A-B: n=9 male *Lyplal1*<sup>+/+</sup>, n=8 male *Lyplal1*<sup>tm1a/tm1a</sup>, n=6 female *Lyplal1*<sup>+/+</sup>, n=5 female *Lyplal1*<sup>tm1a/tm1a</sup>; C-F,J: n=9 male *Lyplal1*<sup>+/+</sup>, n=8 male *Lyplal1*<sup>tm1a/tm1a</sup>, n=6 female *Lyplal1*<sup>+/+</sup>, n=6 female *Lyplal1*<sup>tm1a/tm1a</sup>; G-I: n=9 male *Lyplal1*<sup>+/+</sup>, n=8 male *Lyplal1*<sup>tm1a/tm1a</sup>, n=6 female *Lyplal1*<sup>+/+</sup>, n=7 female *Lyplal1*<sup>tm1a/tm1a</sup>).

**Table S1.** No changes in mass of the listed organs in 28-week-old knockout mice. Mixed model analysis performed using PhenStat (n=10 male *Lyplal1*<sup>+/+</sup>, n=10 male *Lyplal1*<sup>tm1a/tm1a</sup>, n=9 female *Lyplal1*<sup>+/+</sup>, n=8 female *Lyplal1*<sup>tm1a/tm1a</sup>).

| Organ weight (g)  | Male                          |                                     | Female                        |                                     |
|-------------------|-------------------------------|-------------------------------------|-------------------------------|-------------------------------------|
|                   | <i>Lyplal1</i> <sup>+/+</sup> | <i>Lyplal1</i> <sup>tm1a/tm1a</sup> | <i>Lyplal1</i> <sup>+/+</sup> | <i>Lyplal1</i> <sup>tm1a/tm1a</sup> |
| Gastrocnemius     | 0.151 ± 0.010                 | 0.151 ± 0.009                       | 0.126 ± 0.006                 | 0.141 ± 0.015                       |
| Tibialis anterior | 0.076 ± 0.012                 | 0.076 ± 0.013                       | 0.059 ± 0.009                 | 0.059 ± 0.009                       |
| Heart             | 0.157 ± 0.013                 | 0.156 ± 0.020                       | 0.128 ± 0.019                 | 0.140 ± 0.012                       |
| Kidney            | 0.209 ± 0.021                 | 0.209 ± 0.016                       | 0.159 ± 0.014                 | 0.158 ± 0.014                       |
| Liver             | 2.330 ± 0.706                 | 2.405 ± 0.660                       | 1.504 ± 0.262                 | 1.529 ± 0.244                       |
| Spleen            | 0.098 ± 0.023                 | 0.099 ± 0.016                       | 0.104 ± 0.017                 | 0.106 ± 0.017                       |
